# Supplementary material for: Activated-memory T cells influence naïve T cell fate: a noncytotoxic function of human CD8 T cells
Source: PubMed Central journal article supplement (PMC9243096; doi:10.1038/s42003-022-03596-2), 2022-06-29
Supplement: 42003_2022_3596_MOESM2_ESM.pdf [file 42003_2022_3596_MOESM2_ESM.pdf]

a-

Live CD8 T cells

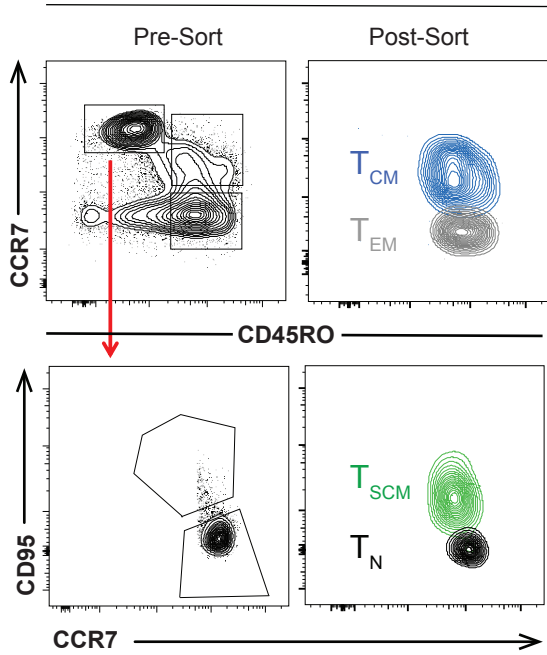

c-

Gated on live singlet CTV<sup>+</sup>  
Naive CD8 T cells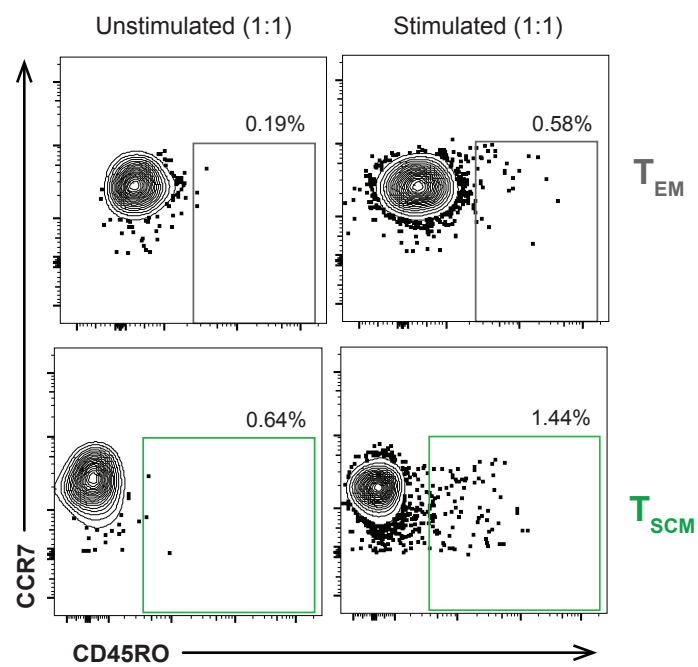

b-

 $T_N$  + Stim.  $T_{CM}$  (1:1)  
Gated on singlet live cells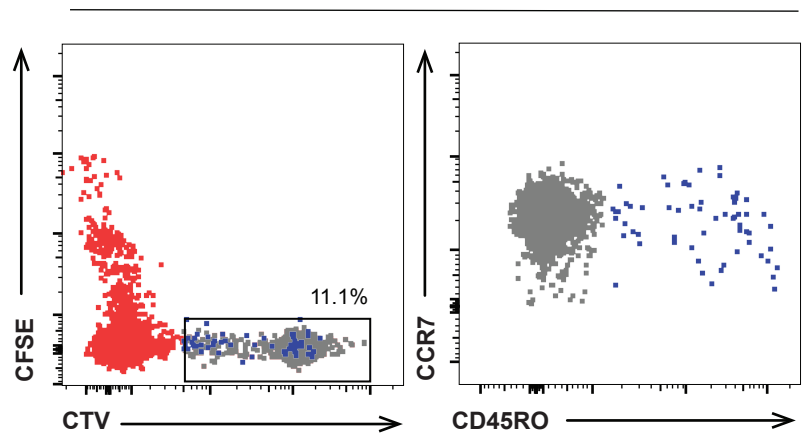

d-

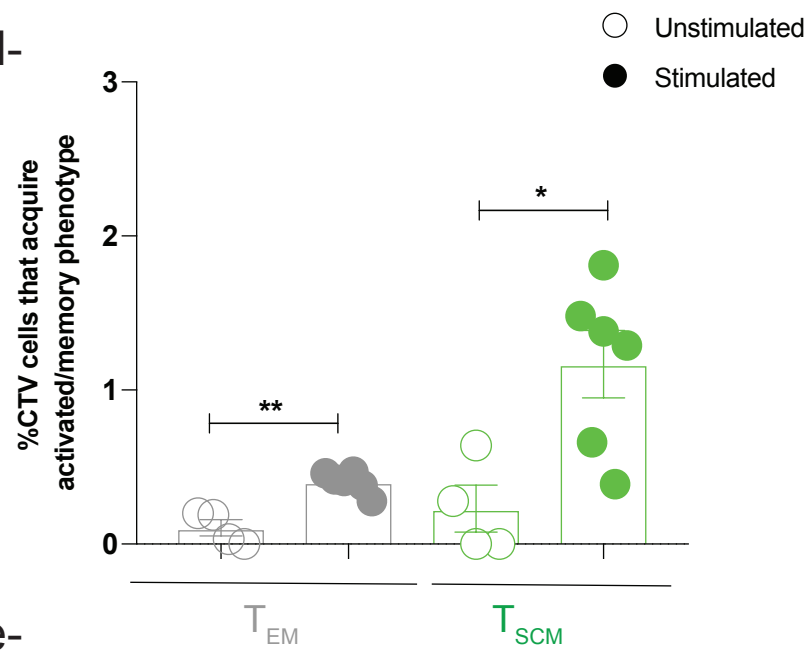

e-

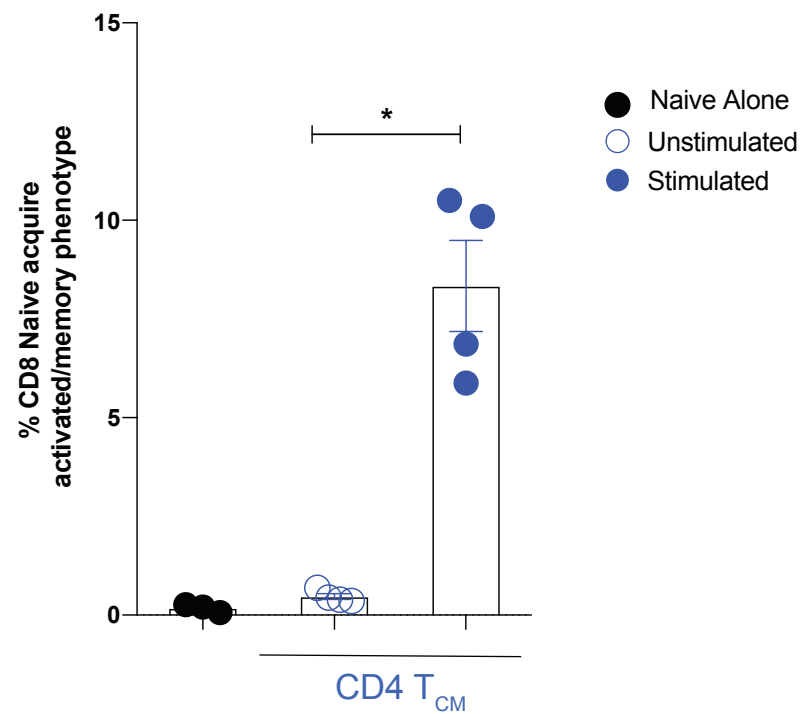

**Supplementary Figure 1: a** Representative contour flow plots showing flow cytometry-based strategy for isolation of naïve and memory CD8 T cell subsets from lymphocytes of healthy adults. The cell subsets were identified based on differential expression of three cell surface markers as follows: Naïve: CCR7<sup>+</sup>, CD45RO<sup>-</sup>, and CD95<sup>-</sup>; T<sub>EM</sub>: CCR7<sup>-</sup> and CD45RO<sup>+</sup>; T<sub>CM</sub>: CCR7<sup>+</sup>, and CD45RO<sup>+</sup>; and T<sub>SCM</sub>: CCR7<sup>+</sup>, CD45RO<sup>-</sup>, and CD95<sup>+</sup>. **b** Representative flow contour plot showing the distribution of T<sub>N</sub> CD8 T cells with acquired activated/memory phenotype within the CTV<sup>+Int.</sup> population. **c** Representative flow contour plots and **d** Bar-graph showing percent of CTV-labeled naïve CD8 T cells that acquire activated/memory phenotype based on CCR7 and CD45RO cell surface expression (n=4-6) in the presence of unstimulated or stimulated T<sub>EM</sub> (grey box), or T<sub>SCM</sub> (green box) CD8 T cells (memory: naïve - 1:1 ratio). **e** Bar-graph showing percent of naïve CD8 T cells that acquire activated/memory phenotype based on CCR7 and CD45RO cell surface expression in the presence (n=4) of unstimulated or stimulated T<sub>CM</sub> CD4 T cells (blue box), at memory: naïve (1:1 ratio). Closed circles depict stimulation conditions while open circles depict unstimulated conditions \**P*<0.05 \*\**P*<0.01 Unpaired non-parametric Mann-Whitney test was used. Data were presented as means +/- SEM.

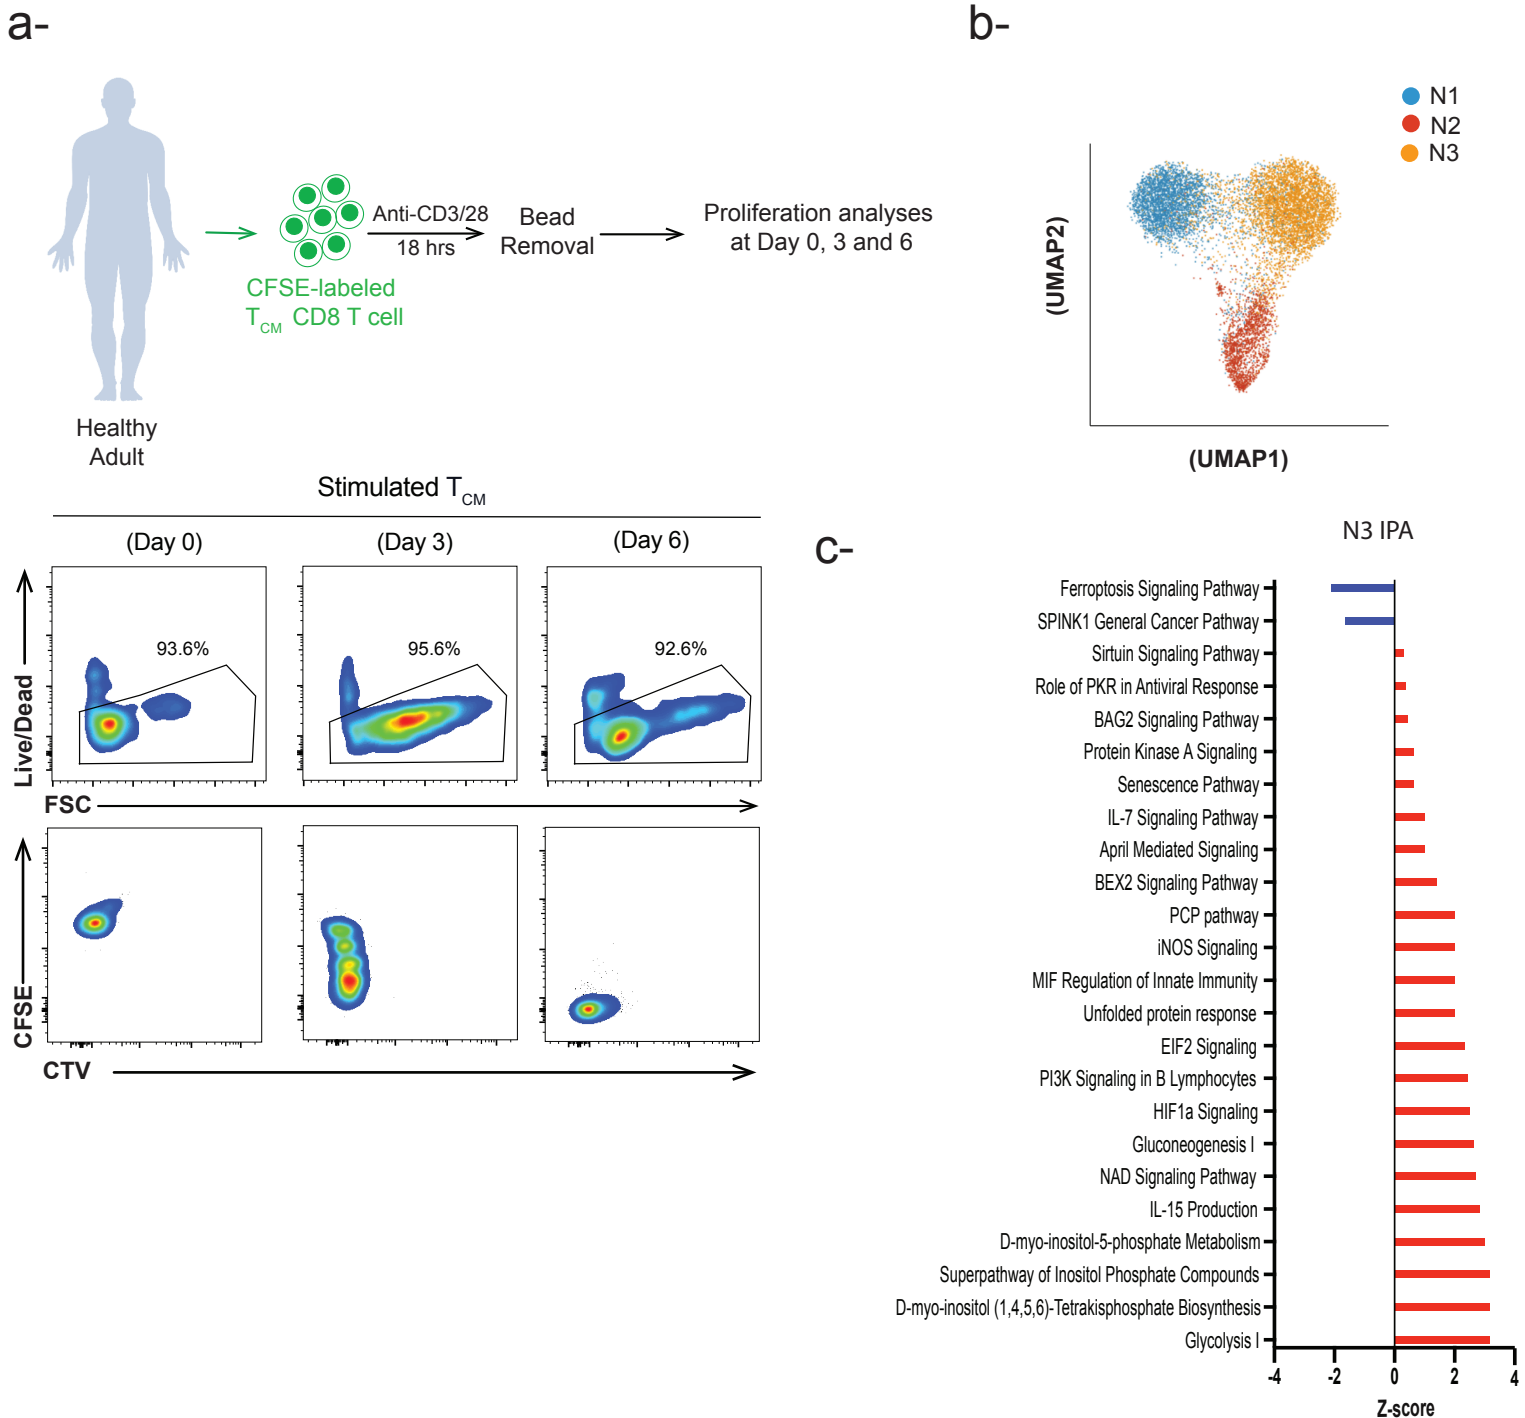

**Supplementary Figure 2: a** *In vitro* schema and FACS-plots showing stimulation of sorted CFSE-labeled human T<sub>CM</sub> CD8 T cell subset with anti-CD3/CD28 magnetic beads (1:1 ratio). After overnight stimulation, the beads were removed using a plate magnet followed by culturing activated T<sub>CM</sub> CD8 T cell without further manipulation. Proliferation capacity was measured at Day 0, 3, 6 incubations. **b** UMAP analyses focusing on the top 2000 genes showing Blue neighborhood-N1, Red neighborhood-N2, and Orange neighborhood-N3. **c** Ingenuity pathway analyses (IPA) of the unique DEG list in N3 (Orange neighborhood) showing top pathways based on Z-score.

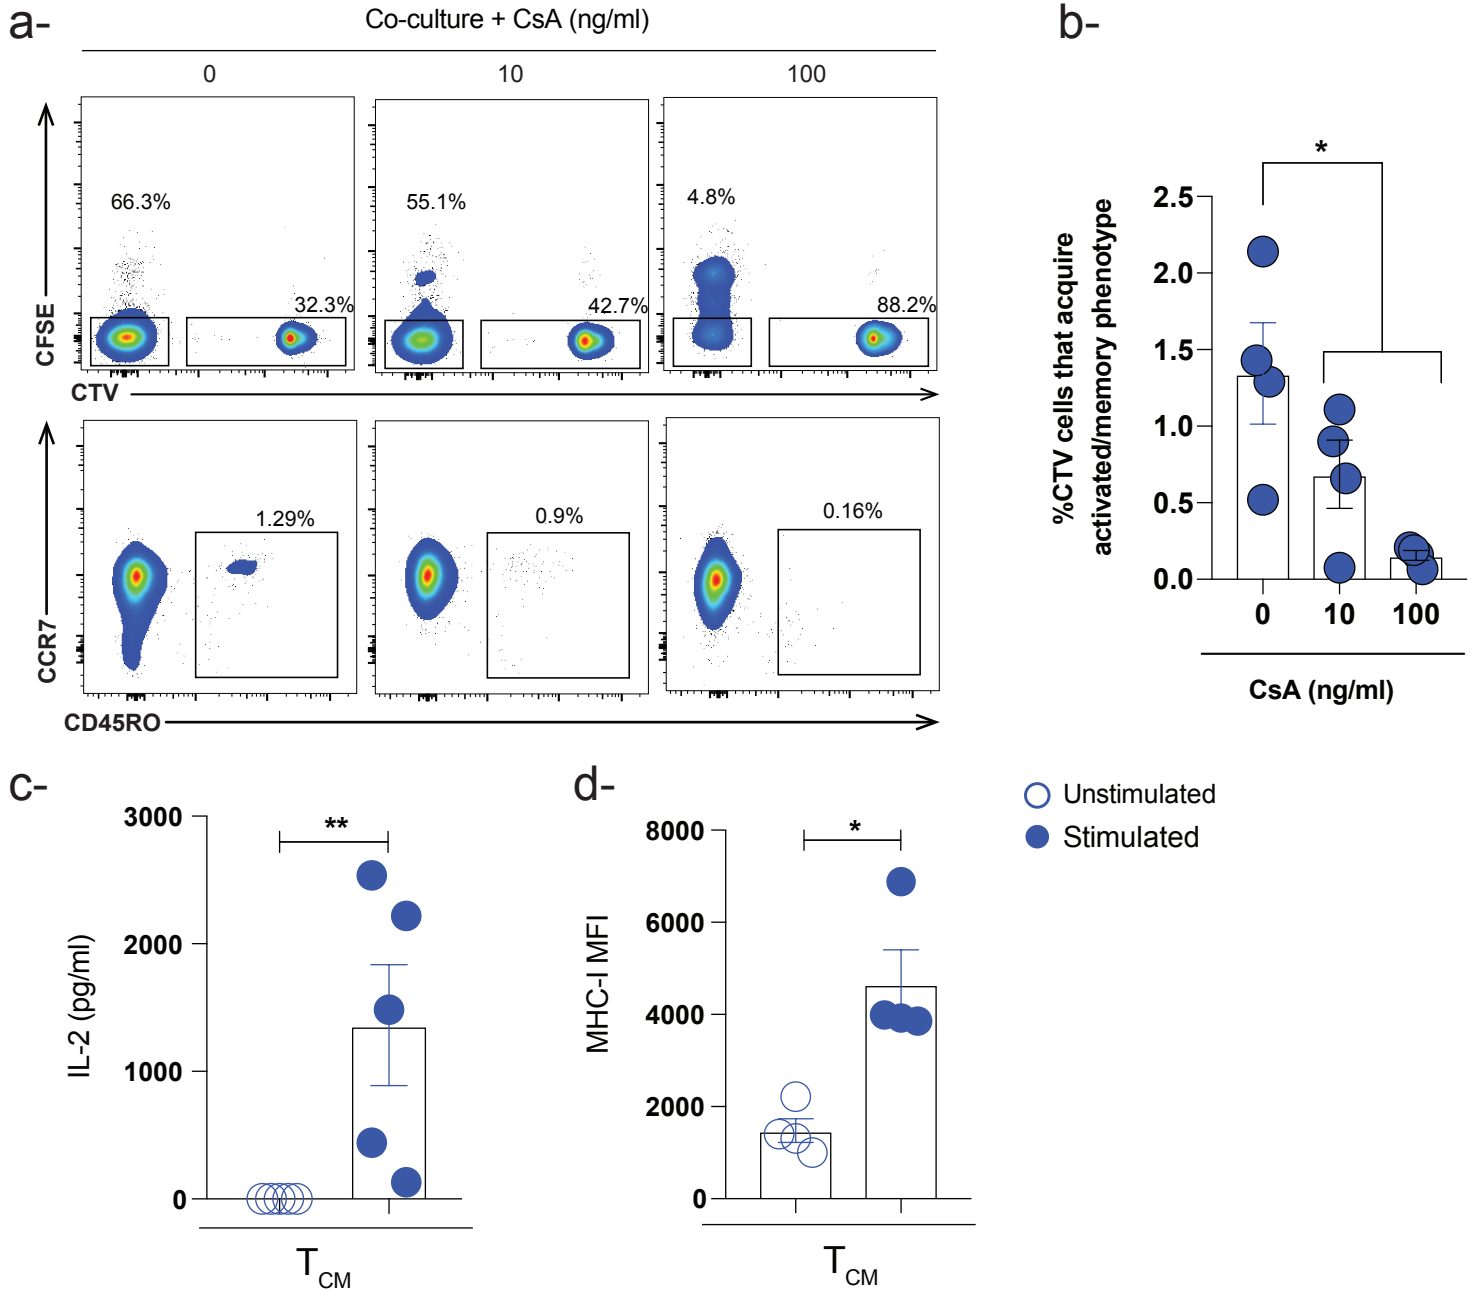

e-

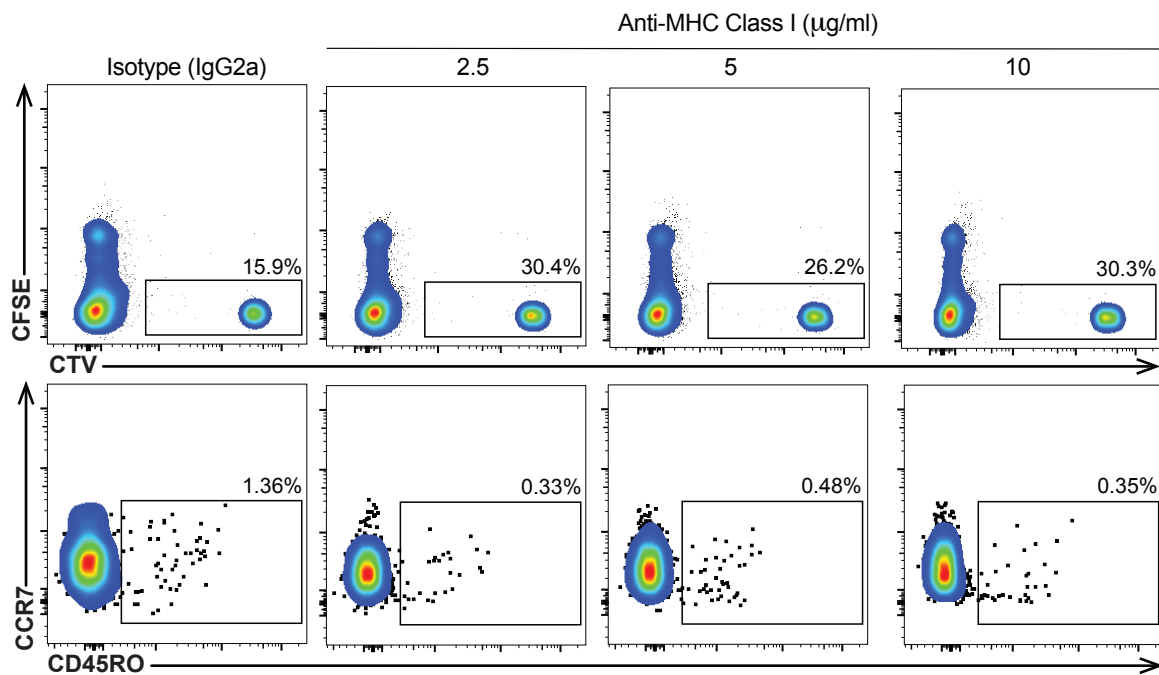

**Supplementary Figure 3:** **a** Representative flow plots and **b** Bar-graph showing the effect of Cyclosporin A (CsA) on proliferation of T<sub>CM</sub> CD8 T cells as well as naïve cells with activated/memory phenotype (n=4). **c** Bar-graph showing IL-2 concentrations in the supernatant of stimulated T<sub>CM</sub> CD8 cells (7 days of following 18 hrs of beads stimulation) compared to unstimulated controls (n=5). **d** Bar-graph showing MFI of MHC-I in unstimulated and stimulated T<sub>CM</sub> CD8 T cells following overnight beads removal (n=4). **e** Representative flow plots showing the effect of blocking MHC-I on acquisition of activated/memory phenotype by naïve CD8 T cells in the presence of activated T<sub>CM</sub> CD8 T cells. \* $P < 0.05$  \*\* $P < 0.01$  Unpaired non-parametric Mann-Whitney test was used (Panels c-d). Ordinary one-way ANOVA Bonferroni multiple comparison test was used \* $P < 0.05$ . Data were presented as means +/-SEM (Panel b).

|                                                | Gene ID        | N2 vs N1     |             | N3 Vs N1 |             | N3 vs N2 |             |
|------------------------------------------------|----------------|--------------|-------------|----------|-------------|----------|-------------|
|                                                |                | P-value      | Fold change | P-value  | Fold change | P-value  | Fold change |
| <b>Effector cytokines, molecules, &amp; TF</b> | <i>GZMA</i>    | 0.00         | 17.98       | 0.70     | 1.15        | 0.00     | -15.58      |
|                                                | <i>GZMB</i>    | 0.00         | 13.81       | 0.61     | 1.00        | 0.00     | -13.78      |
|                                                | <i>GZMK</i>    | 0.00         | 13.02       | 0.55     | 1.33        | 0.00     | -9.82       |
|                                                | <i>PRF1</i>    | 0.00         | 10.28       | 0.96     | 1.05        | 0.00     | -9.82       |
|                                                | <i>IFNG</i>    | 0.00         | 6.33        | 0.74     | 1.13        | 0.00     | -5.60       |
|                                                | <i>IL4</i>     | 0.00         | 3.03        | 0.56     | -1.22       | 0.00     | -3.70       |
|                                                | <i>TBX21</i>   | 0.00         | 7.48        | 0.69     | 1.19        | 0.00     | -6.29       |
|                                                | <i>ID2</i>     | 0.00         | 4.42        | 0.81     | 1.14        | 0.00     | -3.88       |
|                                                | <i>ZEB2</i>    | 0.00         | 6.56        | 0.58     | 1.28        | 0.00     | -5.12       |
|                                                | <i>RUNX3</i>   | 0.00         | 4.06        | 0.00     | 2.01        | 0.00     | -2.02       |
|                                                | <i>GATA3</i>   | 0.00         | 3.12        | 0.56     | 1.05        | 0.00     | -2.98       |
|                                                | <i>EOMES</i>   | 0.00         | 2.65        | 0.24     | -1.30       | 0.00     | -3.44       |
|                                                | <i>HOPX</i>    | 0.00         | 9.19        | 0.89     | 1.13        | 0.00     | -8.14       |
|                                                | <i>PRDM1</i>   | 0.00         | 5.69        | 0.46     | 1.29        | 0.00     | -4.42       |
|                                                | <i>IRF4</i>    | 0.00         | 4.32        | 0.73     | 1.01        | 0.00     | -4.29       |
|                                                | <i>TCF7</i>    | 0.00         | -12.95      | 0.00     | -1.81       | 0.00     | 7.17        |
|                                                | <i>LEF1</i>    | 0.00         | -5.42       | 0.00     | -1.07       | 0.00     | 5.08        |
| <i>FOXP1</i>                                   | 0.00           | -2.07        | 0.00        | 1.18     | 0.00        | 2.45     |             |
| <b>Glycolysis</b>                              | <i>HK2</i>     | 0.00         | 3.21        | 0.00     | 7.48        | 0.19     | 2.33        |
|                                                | <i>TPI1</i>    | 0.00         | 4.30        | 0.00     | 3.33        | 0.00     | -1.29       |
|                                                | <i>LDHA</i>    | 0.00         | 4.15        | 0.00     | 4.55        | 0.01     | 1.10        |
|                                                | <i>ALDOA</i>   | 0.00         | 2.46        | 0.00     | 4.11        | 0.00     | 1.67        |
|                                                | <i>SLC2A3</i>  | 0.00         | 8.82        | 0.00     | 3.79        | 0.00     | -2.33       |
| <b>Miscellaneous</b>                           | <i>CD69</i>    | 5.59717E-319 | 4.94        | 0.00     | 2.41        | 0.00     | -2.05       |
|                                                | <i>CD95</i>    | 0.00         | 6.03        | 0.34     | 1.21        | 0.00     | -4.98       |
|                                                | <i>HNRNPLL</i> | 0.00         | 3.01        | 0.04     | -1.15       | 0.00     | -3.47       |
|                                                | <i>LTB</i>     | 0.00         | 2.27        | 0.00     | -1.22       | 0.00     | -2.78       |
|                                                | <i>SLAMF7</i>  | 0.00         | 10.23       | 0.32     | 1.46        | 0.00     | -6.99       |
|                                                | <i>PASK</i>    | 0.00         | -5.74       | 0.00     | -4.77       | 0.00     | 1.20        |
|                                                | <i>LRRN3</i>   | 0.00         | -4.27       | 0.00     | -5.64       | 0.00     | -1.32       |
|                                                | <i>IL6R</i>    | 0.00         | -5.68       | 0.00     | -1.55       | 0.00     | 3.66        |
|                                                | <i>IL6ST</i>   | 0.00         | -2.57       | 0.23     | 1.14        | 0.00     | 2.94        |
|                                                | <i>IL7R</i>    | 0.00         | -5.56       | 0.00     | -1.68       | 0.00     | 3.31        |
|                                                | <i>NOSIP</i>   | 0.00         | -1.06       | 0.00     | 1.37        | 0.00     | 1.45        |
| <i>NUR77</i>                                   | 0.00           | 3.12         | 0.09        | 1.58     | 0.00        | -1.98    |             |

**Supplementary Table 1:** Table showing fold change and P values for the gene list described in Figure 6d heat maps.
