# Supplementary material for: Activated-memory T cells influence naïve T cell fate: a noncytotoxic function of human CD8 T cells
Source: PubMed Central journal article supplement (PMC9243096; doi:10.1038/s42003-022-03596-2), 2022-06-29
Supplement: 42003_2022_3596_MOESM3_ESM.pdf [file 42003_2022_3596_MOESM3_ESM.pdf]

## Description of Additional Supplementary Files

**File name:** Supplementary Data 1

**Description:** The source data behind the graphs in the paper.
